# Supplementary material for: Autophagy and Inflammasome Activation in Dilated Cardiomyopathy
Source: MDPI journal article supplement (doi:10.3390/jcm8101519), 2019-09-21
Supplement: s1 [file s1]

**Supplementary Table 1. Clinical, demographic and anatomical parameters of the patients whose hearts were included in the metabolomic study.**

|                                        | Cardiomyopathy<br>(n=7) | Controls<br>(n=7) | Normal<br>Values | P      |
|----------------------------------------|-------------------------|-------------------|------------------|--------|
| Age (Yr)                               | 49.0±13.0               | 81.6±11.2         | -                | <0.001 |
| Sex (M/F)                              | 5/2                     | 2/5               | -                | n.s.   |
| Duration of<br>disease (Years)         | 11.1±6.7                | -                 | -                |        |
| NYHA class (%)                         |                         |                   |                  |        |
| III                                    | 67                      | -                 | -                | -      |
| IV                                     | 33                      | -                 | -                | -      |
| Echocardiography §                     |                         |                   |                  |        |
| Left ventricular<br>diameter (mm)      |                         |                   |                  |        |
| Systolic                               | 69±11                   | -                 | 21.6-34.8        | -      |
| Diastolic                              | 73±10                   | -                 | 37.8-52.2        | -      |
| LV Ejection<br>Fraction (%)            | 21.1±12.3               | -                 | 54-74            | -      |
| Gross Anatomy †                        |                         |                   |                  |        |
| Heart Weight (g)                       | 438.9±176.9             | -                 | 196-516          |        |
| Transverse<br>diameter (mm)            | 117±17                  | -                 | -                |        |
| Inner<br>longitudinal<br>diameter (mm) | 94±18                   | -                 | -                |        |
| Wall thickness<br>(mm)                 |                         |                   |                  |        |
| LV                                     | 9±1.3                   | -                 | -                |        |
| RV                                     | 7.0 ±2.7                | -                 | -                |        |
| Septum                                 | 13.0±1.9                | -                 | -                |        |
| Pharmacological therapy                |                         |                   |                  |        |
| ACE-I/ARB (%)                          | 100                     | -                 |                  |        |
| β-Blockers (%)                         | 83                      | -                 |                  |        |
| Digitalis (%)                          | 20                      | -                 |                  |        |
| Dobutamine (%)                         | 33                      | -                 |                  |        |
| Amiodarone (%)                         | 40                      | -                 |                  |        |
| Antialdosteronic<br>(%)                | 40                      | -                 |                  |        |
| K Sparing<br>diuretics (%)             | 60                      | -                 |                  |        |
| Loop diuretics<br>(%)                  | 80                      | -                 |                  |        |
| Insulin /<br>Antidiabetics (%)         | 20                      | -                 |                  |        |
| Statins (%)                            | 0                       | -                 |                  |        |
| Oral<br>Anticoagulants<br>(%)          | 20                      | -                 |                  |        |
| Tiroxin (%)                            | 20                      | -                 |                  |        |

Normal value as in: (§) Lang RM, Badano LP, Mor-Avi V, Afilalo J, Armstrong A, Ernande L, Flachskampf FA, Foster E, Goldstein SA, Kuznetsova T, Lancellotti P, Muraru D, Picard MH, Rietzschel ER, Rudski L, Spencer KT, Tsang W and Voigt JU. Recommendations for cardiac chamber quantification by echocardiography in adults: an update from the American Society of Echocardiography and the European Association of Cardiovascular Imaging. *Eur Heart J Cardiovasc Imaging*. 2015;16:233-70; (‡) Bangalore S and Bhatt DL. Images in cardiovascular medicine. Right heart catheterization, coronary angiography, and percutaneous coronary intervention. *Circulation*. 2011;124:e428-33; (†) Sheppard M. Practical Cardiovascular Pathology, 2nd edition: Taylor & Francis; 2011.
