# Supplementary material for: Autophagy and Inflammasome Activation in Dilated Cardiomyopathy
Source: MDPI journal article supplement (doi:10.3390/jcm8101519), 2019-09-21
Supplement: s1 [file s1]

**Supplementary Table2: Antibodies and experimental conditions employed for histological, cellular and Western Blotting studies.**

| Antigen                     | Company                    | Dilution | Antigen retrieval | Incubation time | Incubation temperature | Secondary antibody |           |
|-----------------------------|----------------------------|----------|-------------------|-----------------|------------------------|--------------------|-----------|
| Poly-Ubiquitinated proteins | Enzo Lifescience           | 1:300    | pH6               | 1h              | RT                     | IHC (EnVision)     | Histology |
| Vimentin                    | Abcam                      | 1:100    | pH6               | 2h              | 37°C                   | A488 anti Rabbit   |           |
| p62SQSTM1                   | MBL                        | 1:500    | pH6               | 1h              | RT                     | IHC (EnVision)     |           |
| LAMP2                       | Abcam                      | 1:20     | pH6               | 1h              | 37°C                   | A488 anti Mouse    |           |
| Galectin3                   | R&D                        | 1:200    | pH6               | O/N             | 4°C                    | A555 anti Goat     |           |
| TFEB                        | Abcam                      | 1:200    | pH9               | O/N             | 4°C                    | A555 anti Rabbit   |           |
| Parkin                      | Biorbyt                    | 1:100    | pH9               | 1h              | RT                     | IHC (EnVision)     |           |
| 4-hydroxynonenal            | Bioss                      | 1:500    | pH6               | 1h              | RT                     | IHC (EnVision)     |           |
| 53BP1                       | Abcam                      | 1:50     | pH6               | O/N             | 4°C                    | A488 anti Rabbit   |           |
| APE/Ref-1                   | Kind gift of Prof. G. Tell | 1:100    | pH6               | 1h              | RT                     | IHC (EnVision)     |           |
| p65 RelA                    | Abcam                      | 1:500    | pH6               | O/N             | 4°C                    | IHC (EnVision)     |           |
| IL18                        | Abcam                      | 1:50     | pH9               | O/N             | 4°C                    | IHC (EnVision)     |           |
| NLRP3                       | Cell Signaling             | 1:500    | pH9               | O/N             | 4°C                    | A488 anti Rabbit   |           |
| Caspase1                    | ThermoFisher               | 1:600    | pH9               | 1h              | 37°C                   | A555 anti Mouse    |           |
| PDGFRβ                      | ThermoFisher               | 1:50     | pH6               | O/N             | 4°C                    | A555 anti Rabbit   |           |
| Alpha-Smooth Muscle Actin   | Dako                       | 1:100    | pH6               | 1h              | 37°C                   | A488 anti Mouse    |           |
| Alpha-Sarcomeric Actin      | Sigma                      | 1:400    | pH6 or pH9        | 1h              | 37°C                   | Cy5 anti Mouse IgM |           |

| Antigen      | Company          | Dilution | Antigen retrieval | Incubation time | Incubation temperature | Secondary antibody |          |
|--------------|------------------|----------|-------------------|-----------------|------------------------|--------------------|----------|
| NG2          | ThermoFisher     | 1:100    | Triton X, 1:100   | O/N             | 4°C                    | A488 anti Mouse    | Cytology |
| PDGFRα       | ThermoFisher     | 1:100    | Triton X, 1:100   | 2h              | 37°C                   | A488 anti Mouse    |          |
| PDGFRβ       | ThermoFisher     | 1:100    | Triton X, 1:100   | O/N             | 4°C                    | A555 anti Rabbit   |          |
| Tbx18        | ThermoFisher     | 1:100    | Triton X, 1:100   | O/N             | 4°C                    | A555 anti Rabbit   |          |
| p16INK4A     | CIN-TEK          | 1:2      | Triton X, 1:100   | O/N             | 4°C                    | A488 anti Mouse    |          |
| γH2A.X       | Millipore        | 1:500    | Triton X, 1:100   | 2h              | 37°C                   | A555 anti Mouse    |          |
| Ki67         | Leica-Novocastra | 1:1000   | Triton X, 1:100   | O/N             | 4°C                    | A488 anti Rabbit   |          |
| Galectin3    | R&D              | 1:1000   | Triton X, 1:100   | O/N             | 4°C                    | A647 anti Goat     |          |
| LAMP2        | Abcam            | 1:100    | Triton X, 1:100   | 2h              | 37°C                   | A555 anti Mouse    |          |
| Parkin       | Biorbyt          | 1:50     | Triton X, 1:100   | O/N             | 4°C                    | A594 anti Rabbit   |          |
| Mitochondria | NeoMarkers       | 1:10     | Triton X, 1:100   | 2h              | 37°C                   | A488 anti Mouse    |          |
| TFEB         | Cell Signaling   | 1:600    | Triton X, 1:100   | O/N             | 4°C                    | A555 anti Rabbit   |          |

| Antigen                        | Company        | Host   | Clonality  | Dilution | Incubation time | Incubation temperature |                  |
|--------------------------------|----------------|--------|------------|----------|-----------------|------------------------|------------------|
| PPM1K                          | ABCAM          | RABBIT | POLYCLONAL | 1:1000   | OVERNIGHT       | +4 °C                  | Western Blotting |
| AKT                            | CELL SIGNALING | RABBIT | MONOCLONAL | 1:1000   | OVERNIGHT       | +4 °C                  |                  |
| Phospho-AKT (Ser473)           | CELL SIGNALING | RABBIT | MONOCLONAL | 1:1000   | OVERNIGHT       | +4 °C                  |                  |
| BECLIN 1                       | CELL SIGNALING | RABBIT | MONOCLONAL | 1:1000   | OVERNIGHT       | +4 °C                  |                  |
| ATG 5                          | CELL SIGNALING | RABBIT | POLYCLONAL | 1:1000   | OVERNIGHT       | +4 °C                  |                  |
| ATG7                           | CELL SIGNALING | RABBIT | POLYCLONAL | 1:1000   | OVERNIGHT       | +4 °C                  |                  |
| mTOR                           | CELL SIGNALING | RABBIT | POLYCLONAL | 1:1000   | OVERNIGHT       | +4 °C                  |                  |
| Phospho-mTOR (Ser2481)         | CELL SIGNALING | RABBIT | POLYCLONAL | 1:1000   | OVERNIGHT       | +4 °C                  |                  |
| Phospho-mTOR (Ser2448)         | CELL SIGNALING | RABBIT | POLYCLONAL | 1:1000   | OVERNIGHT       | +4 °C                  |                  |
| Actin                          | SIGMA          | RABBIT | POLYCLONAL | 1:2000   | 1h              | RT                     |                  |
| GAPDH                          | CELL SIGNALING | RABBIT | MONOCLONAL | 1:2000   | OVERNIGHT       | +4 °C                  |                  |
| AMPKα                          | CELL SIGNALING | RABBIT | MONOCLONAL | 1:1000   | OVERNIGHT       | +4 °C                  |                  |
| Phospho-AMPKα (Thr172)         | CELL SIGNALING | RABBIT | MONOCLONAL | 1:1000   | OVERNIGHT       | +4 °C                  |                  |
| p70 S6 Kinase                  | CELL SIGNALING | RABBIT | POLYCLONAL | 1:1000   | OVERNIGHT       | +4 °C                  |                  |
| Phospho-p70 S6 Kinase (Thr389) | CELL SIGNALING | RABBIT | POLYCLONAL | 1:500    | OVERNIGHT       | +4 °C                  |                  |
| 4E-BP1                         | CELL SIGNALING | RABBIT | MONOCLONAL | 1:1000   | OVERNIGHT       | +4 °C                  |                  |
| Phospho-4E-BP1 (Thr37/46)      | CELL SIGNALING | RABBIT | MONOCLONAL | 1:1000   | OVERNIGHT       | +4 °C                  |                  |
| Parkin                         | CELL SIGNALING | MOUSE  | MONOCLONAL | 1:1000   | OVERNIGHT       | +4 °C                  |                  |
| LC3A/B                         | CELL SIGNALING | RABBIT | MONOCLONAL | 1:1000   | OVERNIGHT       | +4 °C                  |                  |
| SQSTM1/p62                     | CELL SIGNALING | MOUSE  | MONOCLONAL | 1:1000   | OVERNIGHT       | +4 °C                  |                  |

**Legend:**

|      |                                                                 |
|------|-----------------------------------------------------------------|
| pH6  | Flex-Target Retrieval Solution (Agilent) - Low pH, 40' at 98°C  |
| pH9  | Flex-Target Retrieval Solution (Agilent) - High pH, 40' at 98°C |
| A488 | Alexa 488 labeled donkey Antibody                               |
| A555 | Alexa 555 labeled donkey Antibody                               |
| A647 | Alexa 647 labeled donkey Antibody                               |
| Cy5  | Cy5 labeled donkey Antibody                                     |
